# Supplementary material for: Multigenerational exposure to elevated temperatures leads to a reduction in standard metabolic rate in the wild
Source: bioRxiv or medRxiv preprint supplement (doi:10.1101/749986), 2019-11-29
Supplement: Supplementary file [file media-1.pdf]

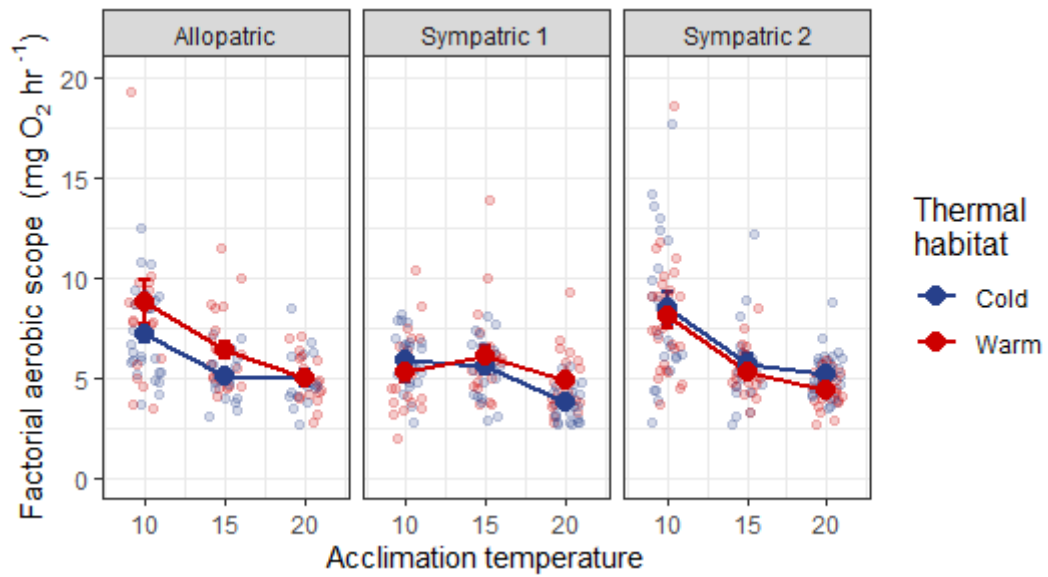

**Supplementary Figure 1.** Factorial aerobic scope (mg O<sub>2</sub> hr<sup>-1</sup>) of threespine sticklebacks from cold and warm habitats in Iceland that were acclimated to 10°C, 15°C, or 20°C. Error bars indicate standard errors, and small circles represent individual data points (blue=cold thermal habitat, red=warm thermal habitat). ‘Allopatric’ refers to Grettislaug and Garðsvatn, ‘sympatric 1’ refers to Áshildarholtsvatn, and ‘sympatric 2’ refers to Mývatn.
