# Supplementary material for: Multigenerational exposure to elevated temperatures leads to a reduction in standard metabolic rate in the wild
Source: bioRxiv or medRxiv preprint supplement (doi:10.1101/749986), 2019-11-29
Supplement: Supplementary file [file media-2.pdf]

**Supplementary Table 1.** Samples sizes for standard metabolic rate (SMR), absolute aerobic scope (AAS), and factorial aerobic scope (FAS) measurements at three acclimation temperatures (10 °C, 15 °C, and 20 °C). ‘Allopatric’ refers to Grettislaug and Garðsvatn, ‘sympatric 1’ refers to Áshildarholtsvatn, and ‘sympatric 2’ refers to Mývatn.

| Population pair        | Thermal habitat | 10 °C | 15 °C | 20 °C |
|------------------------|-----------------|-------|-------|-------|
| Allopatric population  | Warm            | 21    | 22    | 18    |
|                        | Cold            | 27    | 19    | 15    |
| Sympatric population 1 | Warm            | 20    | 21    | 23    |
|                        | Cold            | 24    | 20    | 26    |
| Sympatric population 2 | Warm            | 30    | 19    | 23    |
|                        | Cold            | 24    | 19    | 31    |

**Supplementary Table 2.** Sample sizes for maximum metabolic rate (MMR) measurements at three acclimation temperatures (10 °C, 15 °C, and 20 °C). ‘Allopatric’ refers to Grettislaug and Garðsvatn, ‘sympatric 1’ refers to Áshildarholtsvatn, and ‘sympatric 2’ refers to Mývatn.

| Population pair        | Thermal habitat | 10 °C | 15 °C | 20 °C |
|------------------------|-----------------|-------|-------|-------|
| Allopatric population  | Warm            | 24    | 22    | 21    |
|                        | Cold            | 29    | 19    | 15    |
| Sympatric population 1 | Warm            | 22    | 22    | 24    |
|                        | Cold            | 24    | 20    | 29    |
| Sympatric population 2 | Warm            | 35    | 19    | 23    |
|                        | Cold            | 25    | 19    | 33    |

**Supplementary Table 3.** Results of general linear model testing the effects of thermal habitat (warm or cold), population pair (allopatric, sympatric 1, or sympatric 2), acclimation temperature (10°C, 15°C, or 20°C), and their interactions on factorial aerobic scope (FAS) in threespine stickleback from six populations in Iceland. Df denotes degrees of freedom. Eta-squared ( $\eta^2$ ) represents the percent variance explained by each factor, which was calculated by dividing the sum of squares for each factor by the total sum of squares and multiplying by 100.

|                                                             | Facultative aerobic scope (FAS) |     |          |                  |
|-------------------------------------------------------------|---------------------------------|-----|----------|------------------|
|                                                             | $\eta^2$                        | df  | <i>F</i> | <i>P</i>         |
| Thermal habitat                                             | 0.09                            | 1   | 0.51     | 0.47             |
| Population pair                                             | 3.94                            | 2   | 11.2     | <b>&lt;0.001</b> |
| Acclimation temperature                                     | 21.8                            | 1   | 124      | <b>&lt;0.001</b> |
| Mass                                                        | 1.80                            | 1   | 10.2     | <b>&lt;0.001</b> |
| Thermal habitat × Population pair                           | 0.86                            | 2   | 2.43     | 0.089            |
| Thermal habitat × Acclimation temperature                   | 0.09                            | 1   | 0.54     | 0.46             |
| Population pair × Acclimation temperature                   | 1.29                            | 2   | 3.67     | <b>0.026</b>     |
| Thermal habitat × Population pair × Acclimation temperature | 1.64                            | 2   | 4.66     | <b>0.010</b>     |
| Error                                                       | 68.5                            | 385 |          |                  |
